# Supplementary material for: Cyclofaulknamycin with the Rare Amino Acid D-capreomycidine Isolated from a Well-Characterized Streptomyces albus Strain
Source: MDPI journal article supplement (doi:10.3390/microorganisms9081609), 2021-07-28
Supplement: s1 [file s1]

## Supplementary Materials

### Cyclofaulknamycin with the rare amino acid D-capreomycin isolated from a well-characterised *Streptomyces albus* strain

Horbal L.<sup>1,3§</sup>, Stierhof M.<sup>1§</sup>, Paluszczak A.<sup>1</sup>, Eckert N.<sup>1</sup>, Zapp. J., Luzhetskyy A.<sup>1,2\*</sup>

Department of Pharmaceutical Biotechnology, Saarland University, 66123 Saarbruecken, Germany, [Lihorbal@gmail.com](mailto:Lihorbal@gmail.com) (L.H.); [marc.stierhof@uni-saarland.de](mailto:marc.stierhof@uni-saarland.de) (M.S.); [anja.paluszczak@uni-saarland.de](mailto:anja.paluszczak@uni-saarland.de) (P.A.)

<sup>2</sup> Department of Pharmaceutical Biology, Saarland University, 66123 Saarbruecken, Germany; [j.zapp@mx.uni-saarland.de](mailto:j.zapp@mx.uni-saarland.de) (J.Z.)

<sup>3</sup> AMEG Department, Helmholtz Institute for Pharmaceutical Research Saarland, 66123 Saarbruecken Germany, [nikolas.eckert@uni-saarland.de](mailto:nikolas.eckert@uni-saarland.de) (N.E.)

\* Correspondence: [a.luzhetskyy@mx.uni-saarland.de](mailto:a.luzhetskyy@mx.uni-saarland.de); Tel.: +49-681-302-70200 (A.L.)

**Table S1.** Comparison of the cyclofaulknamycin gene cluster from *S. albus* with the cluster from *S. koyangensis*.

| Gene in the <i>S. albus</i> genome | Gene name   | Putative product                                                                          | Locus in the genome of <i>S. koyangensis</i> VK-A60T |
|------------------------------------|-------------|-------------------------------------------------------------------------------------------|------------------------------------------------------|
| XNR_0965                           |             | urea ABC transporter permease subunit UrtC [Streptomyces albidoflavus]                    |                                                      |
| XNR_0966                           |             | urea ABC transporter ATP-binding protein UrtD [Streptomyces albidoflavus]                 |                                                      |
| XNR_0967                           |             | ATP-binding cassette domain-containing protein [Streptomyces albidoflavus]                |                                                      |
| XNR_0968                           | <i>flkA</i> | DeoR/GlpR transcriptional regulator [Streptomyces sp. CS227]                              | D0C37_RS06225                                        |
| XNR_0969                           | <i>flkB</i> | sugar ABC transporter substrate-binding protein [Streptomyces albidoflavus]               | D0C37_RS06230                                        |
| XNR_0970                           | <i>flkC</i> | integral membrane sugar transporter                                                       | D0C37_RS06235                                        |
| XNR_0971                           | <i>flkD</i> | carbohydrate ABC transporter permease                                                     | D0C37_RS06240                                        |
| XNR_0972                           | <i>flkE</i> | zinc-dependent alcohol dehydrogenase family protein                                       | D0C37_RS06245                                        |
| XNR_0973                           | <i>flkF</i> | DUF2029 domain-containing protein                                                         | D0C37_RS06250                                        |
| XNR_0974                           | <i>flkG</i> | FkbM family methyltransferase                                                             | D0C37_RS06255                                        |
| XNR_0975                           | <i>flkH</i> | glycosyltransferase family 4 protein alpha-(1-2)-phosphatidylinositol mannosyltransferase | D0C37_RS06260                                        |
| XNR_0976                           | <i>flkI</i> | response regulator transcription factor                                                   | D0C37_RS06265                                        |
| XNR_0977                           | <i>flkJ</i> | histidine kinase                                                                          | D0C37_RS06270                                        |
| XNR_0978                           | <i>flkK</i> | ABC transporter ATP-binding protein                                                       | D0C37_RS06275                                        |
| XNR_0979                           | <i>flkL</i> | ABC type antimicrobial transporter permease, FtsX-like permease family protein            | D0C37_RS06280                                        |
| XNR_0980                           | <i>flkM</i> | LuxR family response regulator                                                            | D0C37_RS06285                                        |
| XNR_0981                           | <i>flkN</i> | Two component sensor histidine kinase                                                     | D0C37_RS06290                                        |
| XNR_0982                           | <i>flkO</i> | Alpha/beta hydrolase MppK beta-lactamase, serine hydrolase                                | D0C37_RS06295                                        |
| XNR_0983                           | <i>flkP</i> | NRPS                                                                                      | D0C37_RS06300                                        |
| XNR_0984                           | <i>flkR</i> | MbtH family protein                                                                       | D0C37_RS06305                                        |
| XNR_0985                           | <i>flkS</i> | NRPS                                                                                      | D0C37_RS06310                                        |
| -                                  | -           | NRPS                                                                                      | D0C37_RS06315                                        |
| XNR_0986                           | <i>flkT</i> | Fe(II)/alpha-ketoglutarate-dependent arginine beta-hydroxylase                            | D0C37_RS06320                                        |
| XNR_0987                           | <i>flkU</i> | Major Facilitator Superfamily transporter                                                 | D0C37_RS06325                                        |
| XNR_0988                           | <i>flkV</i> | Cytochrome 450                                                                            | D0C37_RS06330                                        |
| XNR_0989                           | <i>flkW</i> | ArsR family transcriptional regulator                                                     | D0C37_RS06335                                        |
| XNR_0990                           | <i>flkX</i> | Thioesterase, alpha beta hydrolase                                                        | D0C37_RS06340                                        |
| XNR_0991                           |             | Erythromycin esterase protein                                                             |                                                      |
| XNR_0992                           |             | class I SAM-dependent RNA methyltransferase                                               |                                                      |
| XNR_0993                           |             | phenylalanine-specific permease                                                           |                                                      |
| XNR_0994                           |             | TrkA family potassium uptake protein                                                      |                                                      |
| XNR_0995                           |             | TrkA family potassium uptake protein                                                      |                                                      |
| XNR_0996                           |             | DUF3159 domain-containing protein                                                         |                                                      |
| XNR_0997                           |             | OB-fold nucleic acid binding domain-containing protein                                    |                                                      |
| XNR_0998                           |             | Osmosensitive K <sup>+</sup> channel histidine kinase KdpD, response regulator            |                                                      |
| XNR_0999                           |             | sensor histidine kinase KdpD                                                              |                                                      |
| XNR_1000                           |             | ABC transporter                                                                           |                                                      |
| XNR_1001                           |             | Short chain dehydrogenase                                                                 |                                                      |
| XNR_1002                           |             | TetR/AcrR family transcriptional regulator                                                |                                                      |
| XNR_1003                           |             | DUF3710 domain-containing protein                                                         |                                                      |
| <b>XNR_1347</b>                    |             | <b>PLP-dependent aminotransferase (pyridoxal dependent)</b>                               |                                                      |

# 1. NMR Spectroscopy

**Table S2.** NMR data of iso-faulknamycin **1** (DMSO-d<sub>6</sub>, <sup>1</sup>H: 700 MHz, <sup>13</sup>C: 175 MHz)

| unit                                        | δ <sub>c</sub>    | δ <sub>H</sub> , multiplicity,<br>(J in Hz) | COSY             | ROESY | HMBC (H-)      |
|---------------------------------------------|-------------------|---------------------------------------------|------------------|-------|----------------|
| 1 – COOH                                    | n.a. <sup>1</sup> |                                             |                  |       |                |
| 2 – CH                                      | 58.1              | 4.22, m                                     | 3, 5             |       |                |
| 3 – CH                                      | 66.4              | 4.12, m                                     | 2, 4             |       |                |
| 4 – CH <sub>3</sub>                         | 20.3              | 1.06, d (6.1)                               | 3                |       | 2, 3           |
| 5 – NH                                      |                   | 8.37                                        | 2                |       |                |
| 6 – CO                                      | n.a. <sup>1</sup> |                                             |                  |       |                |
| 7 – CH                                      | 54.3              | 4.70, ovl. <sup>2</sup>                     | 8, 14            |       |                |
| 8 – CH                                      | 50.2              | 3.73, m                                     | 7, 9             |       | 8              |
| 9 – CH <sub>2</sub> a<br>CH <sub>2</sub> b  | 22.0              | 1.93, ovl. <sup>2</sup><br>1.67, m          | 8, 10            |       |                |
| 10 – CH <sub>2</sub> a<br>CH <sub>2</sub> b | 36.1              | 3.37, ovl. <sup>2</sup><br>3.19, m          | 9, 11            |       |                |
| 11 – NH                                     |                   | 8.09, bs                                    | 10               |       |                |
| 12 – C                                      |                   | n.a. <sup>1</sup>                           |                  |       |                |
| 12 – NH                                     |                   | n.a. <sup>1</sup>                           |                  |       |                |
| 13 – NH                                     |                   | n.a. <sup>1</sup>                           |                  |       |                |
| 14 – NH                                     |                   | 8.41, d (8.2)                               | 7                | 16    |                |
| 15 – CO                                     | 171.3             |                                             |                  |       |                |
| 16 – CH                                     | 57.8              | 4.33, t (8.1)                               | 17, 20           | 14    | 15, 21         |
| 17 – CH                                     | 30.9              | 2.01, m                                     | 16, 18, 19       |       |                |
| 18 – CH <sub>3</sub>                        | 19.3              | 0.84, ovl. <sup>2</sup>                     | 17               |       | 16, 17, 19     |
| 19 – CH <sub>3</sub>                        | 18.1              | 0.82, ovl. <sup>2</sup>                     | 17               |       | 16, 17, 18     |
| 20 – NH                                     |                   | 8.24, bs                                    | 16               | 22    |                |
| 21 – CO                                     | 172.1             |                                             |                  |       |                |
| 22 – CH                                     | 51.2              | 4.52, m                                     | 23, 27           | 20    |                |
| 23 – CH <sub>2</sub> a<br>CH <sub>2</sub> b | 41.8              | 1.49, ovl. <sup>2</sup><br>1.40, m          | 22, 24           |       |                |
| 24 – CH                                     | 24.2              | 1.50, ovl. <sup>2</sup>                     | 23, 25, 26       |       |                |
| 25 – CH <sub>3</sub>                        | 23.2              | 0.86, ovl. <sup>2</sup>                     | 24               |       | 23, 24, 26     |
| 26 – CH <sub>3</sub>                        | 21.6              | 0.81, ovl. <sup>2</sup>                     | 24               |       | 23, 24, 25     |
| 27 – NH                                     |                   | 8.27, d (8.4)                               | 22               |       | 28             |
| 28 – CO                                     | 169.0             |                                             |                  |       |                |
| 29 – CH                                     | 58.7              | 4.72, ovl. <sup>2</sup>                     | 30, 37           |       | 28             |
| 30 – CH                                     | 72.8              | 5.11, m                                     | 29, 30-OH        |       | 31, 32/36      |
| 30 – OH                                     |                   | 5.68, d (4.6)                               | 30               |       | 29, 30         |
| 31 – C                                      | 142.1             |                                             |                  |       |                |
| 32/36 – CH                                  | 126.1             | 7.42, d (7.3)                               | 33/35            |       | 30, 32, 34, 36 |
| 33/35 – CH                                  | 127.6             | 7.27, t (7.5)                               | 32/36, 34        |       | 31, 33, 35     |
| 34 – CH                                     | 127.0             | 7.20, t (7.0)                               | 33/35            |       | 32, 36         |
| 37 – NH                                     |                   | 8.69, d (8.7)                               | 29               | 39    |                |
| 38 – CO                                     | n.a. <sup>1</sup> |                                             |                  |       |                |
| 39 – CH                                     | 57.4              | 3.93, m                                     | 40, 42           | 37    |                |
| 40 – CH                                     | 64.6              | 3.83, m                                     | 39, 41, 40<br>OH |       |                |
| 40 – OH                                     |                   | 5.39, bs                                    | 40               |       |                |
| 41 – CH <sub>3</sub>                        | 16.5              | 0.39, d (6.0)                               | 40               |       | 39, 40         |
| 42 – NH <sub>2</sub>                        |                   | 7.88, bs                                    | 39               |       |                |

<sup>1</sup>n.a. = not available; <sup>2</sup>ovl. = signal overlap

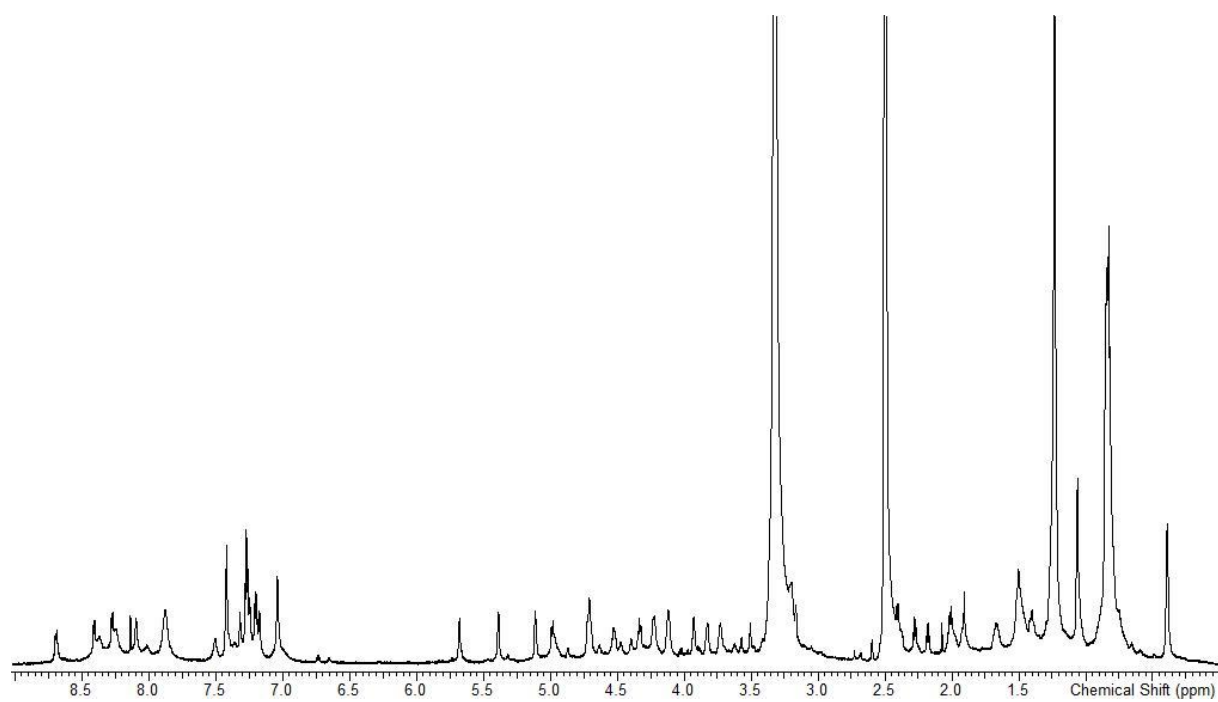

**Figure S1:**  $^1\text{H}$  NMR spectrum of iso-faulknamycin **1** (DMSO- $d_6$ , 700 MHz)

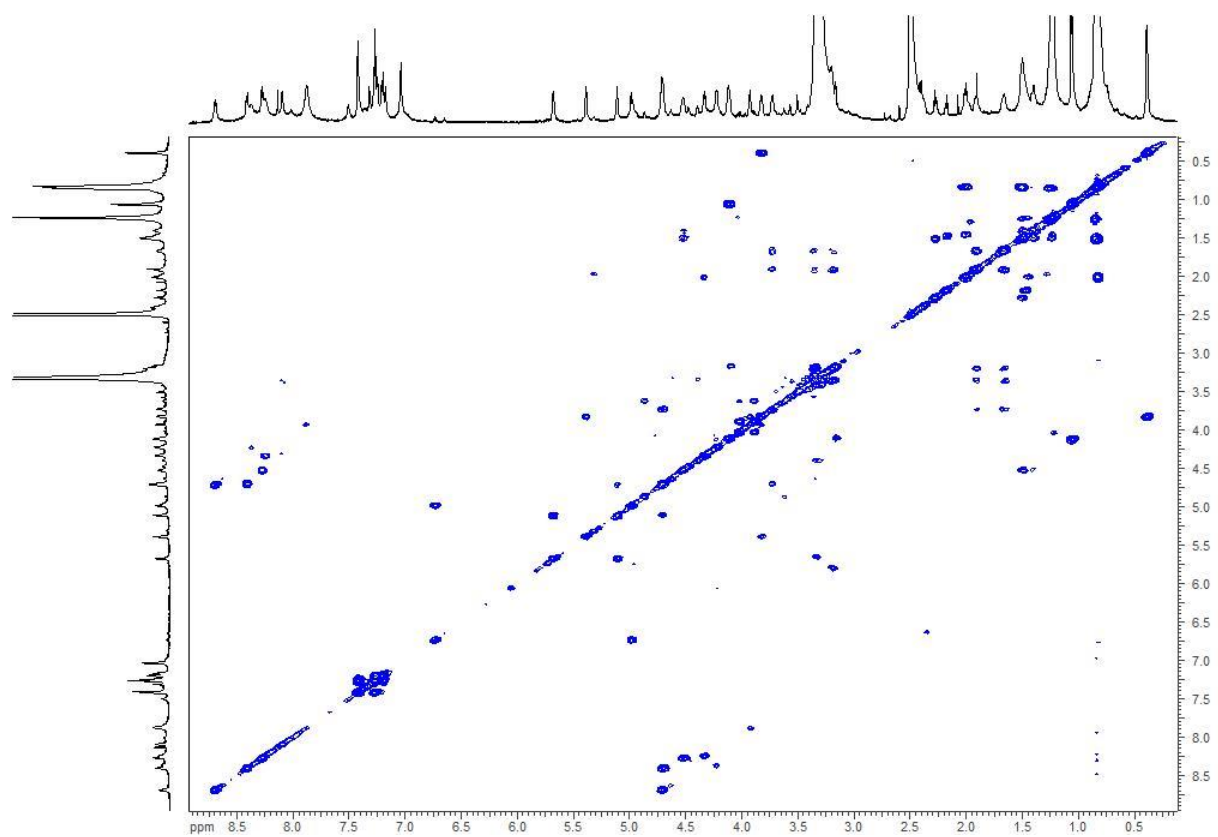

**Figure S2:** COSY spectrum of iso-faulknamycin **1** (DMSO- $d_6$ , 700 MHz)

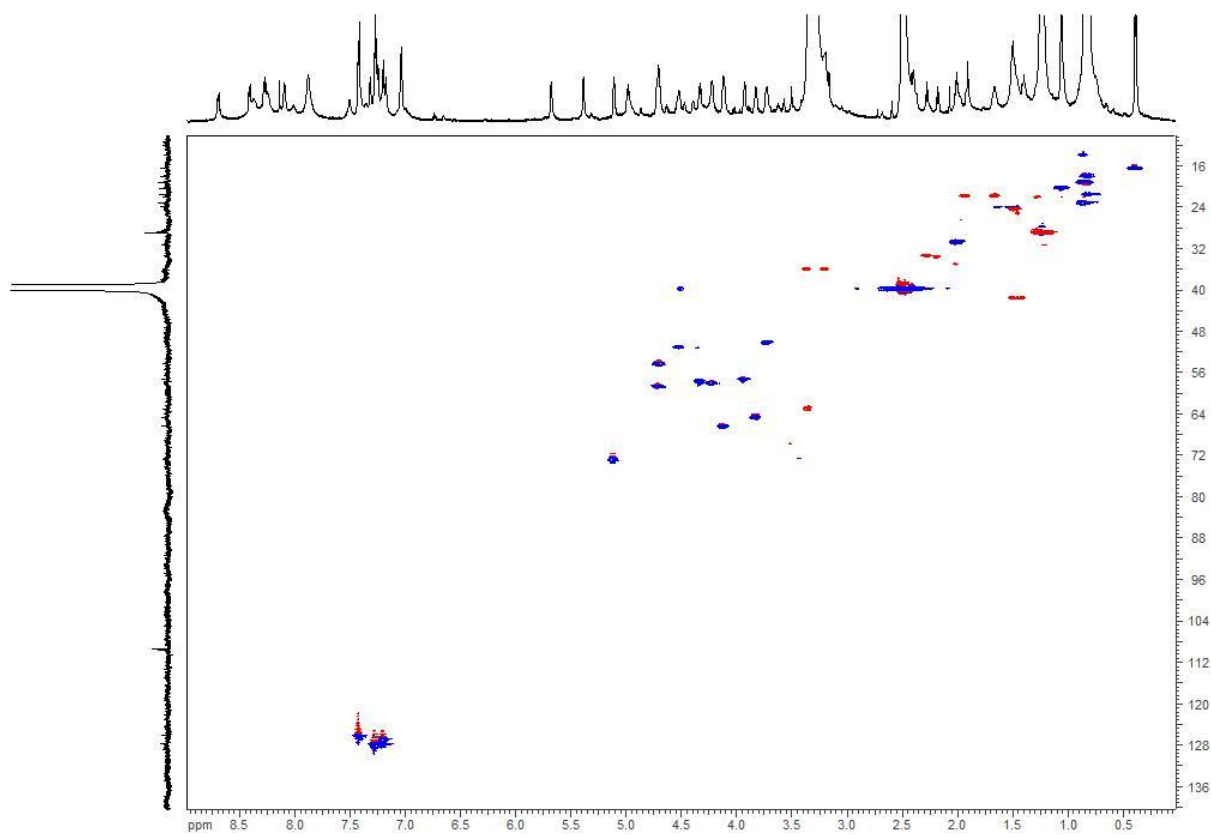

**Figure S3:** HSQC spectrum of iso-faulknamycin **1** (DMSO- $d_6$ , 700 MHz, 175 MHz)

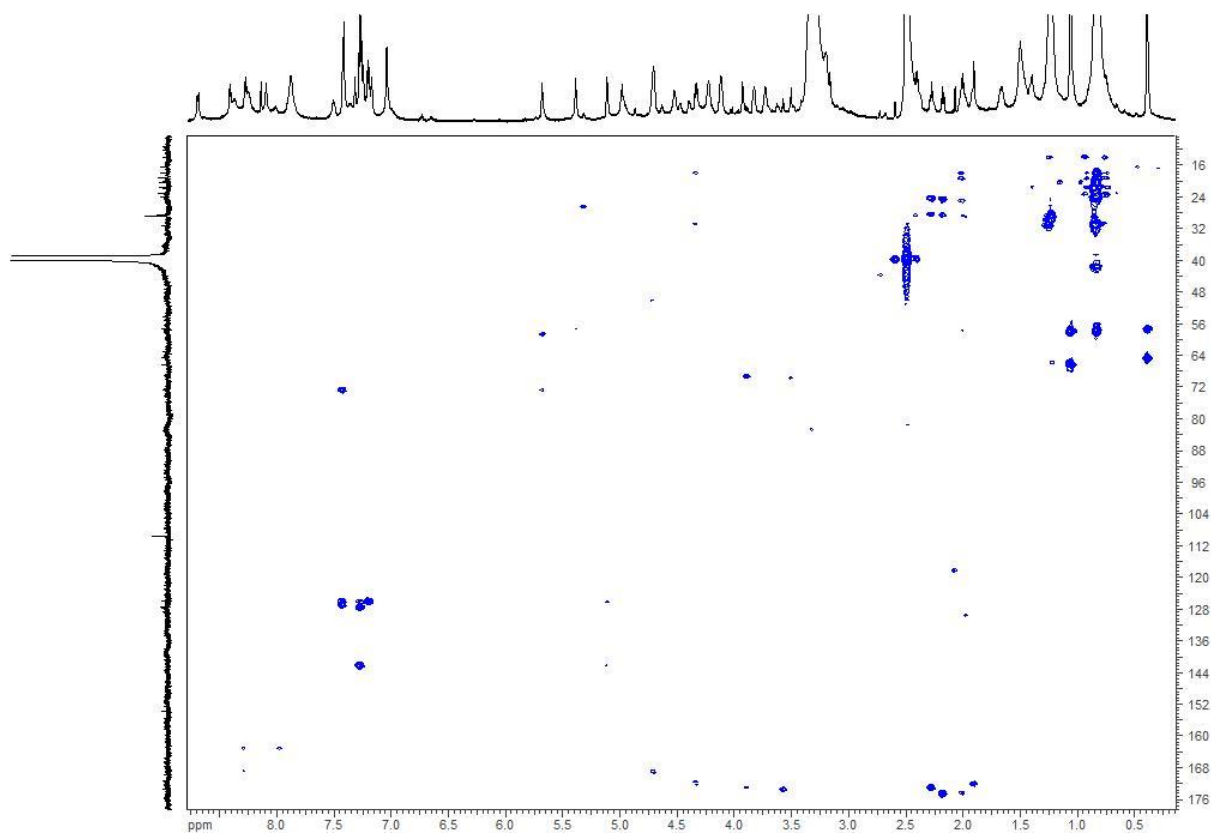

**Figure S4:** HMBC spectrum of iso-faulknamycin **1** (DMSO- $d_6$ , 700 MHz, 175 MHz)

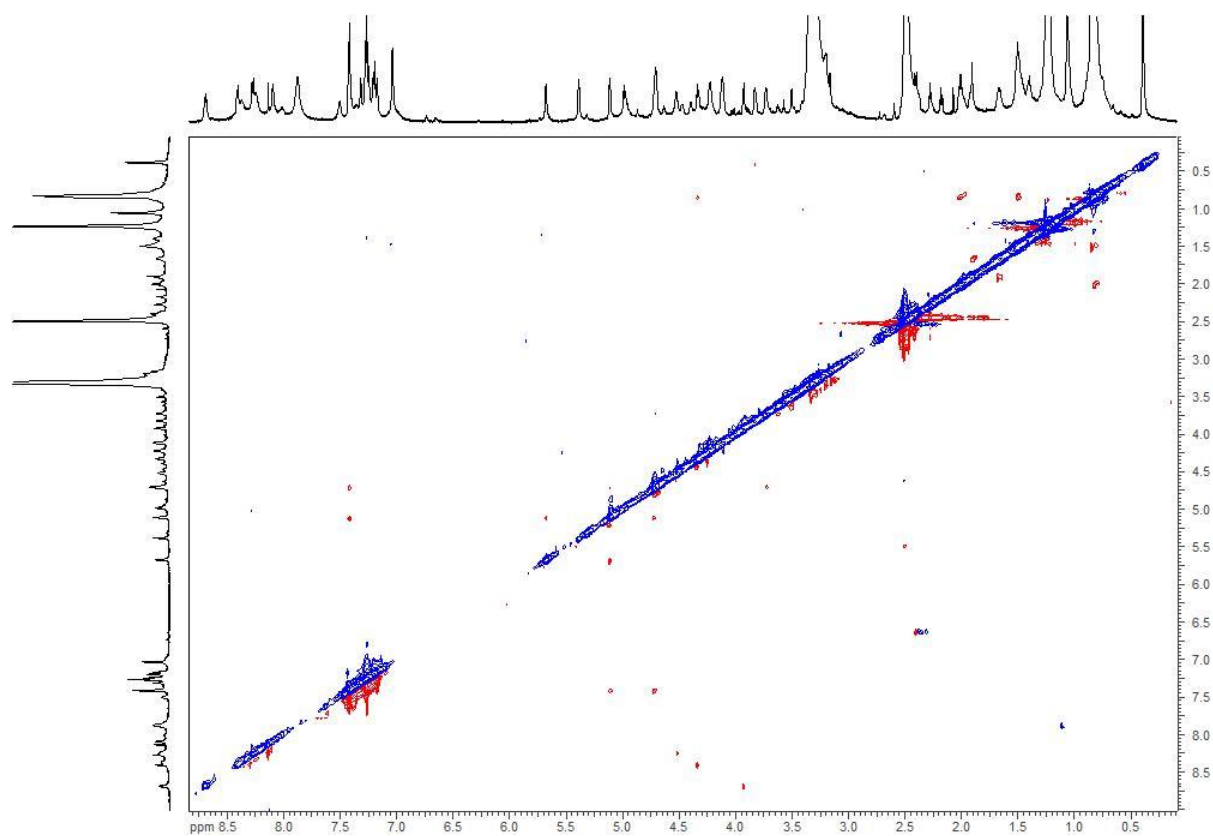

**Figure S5:** ROESY spectrum of iso-faulknamycin **1** (DMSO- $d_6$ , 700 MHz)

**Table S3:** NMR data of cyclofaulknamycin **2** (DMSO-d<sub>6</sub>, <sup>1</sup>H: 700 MHz, <sup>13</sup>C: 175 MHz)

| unit                                        | δ <sub>c</sub> | δ <sub>H</sub> , multiplicity,<br>(J in Hz) | COSY       | ROESY | HMBC (H-)     |
|---------------------------------------------|----------------|---------------------------------------------|------------|-------|---------------|
| 1 – CO                                      | 171.6          |                                             |            |       |               |
| 2 – CH                                      | 62.7           | 3.89, m                                     | 3, 5       | 42    |               |
| 3 – CH                                      | 65.0           | 3.85, ovl                                   | 2, 4       |       |               |
| 4 – CH <sub>3</sub>                         | 20.9           | 1.09, d (6.0)                               | 3          |       | 2, 3          |
| 5 – NH                                      |                | 8.94, bs                                    | 2          |       |               |
| 6 – CO                                      | n.a            |                                             |            |       |               |
| 7 – CH                                      | 54.5           | 4.69, t (6.6)                               | 8, 14      |       |               |
| 8 – CH                                      | 50.7           | 3.84, ovl                                   | 7, 9       |       |               |
| 9 – CH <sub>2</sub>                         | 21.3           | 1.76, m                                     | 8, 10      |       |               |
| 10 – CH <sub>2</sub>                        | 36.3           | 3.11                                        | 9          |       |               |
| 11 – NH                                     |                | n.a                                         |            |       |               |
| 12 – C                                      | n.a            |                                             |            |       |               |
| 12 – NH                                     |                | n.a.                                        |            |       |               |
| 13 – NH                                     |                | n.a                                         |            |       |               |
| 14 – NH                                     |                | 7.91, bs                                    | 7          |       |               |
| 15 – CO                                     | n.a            |                                             |            |       |               |
| 16 – CH                                     | 60.1           | 3.97, dd (6.4, 11.6)                        | 17, 20     |       | 21            |
| 17 – CH                                     | 29.4           | 2.2, m                                      | 16, 18, 19 |       |               |
| 18 – CH <sub>3</sub>                        | 20.0           | 0.86, ovl                                   | 17         |       | 16, 17, 19    |
| 19 – CH <sub>3</sub>                        | 18.5           | 0.88, ovl                                   | 17         |       | 16, 17, 18    |
| 20 – NH                                     |                | 8.73                                        | 16         | 22    |               |
| 21 – CO                                     | 172.4          |                                             |            |       |               |
| 22 – CH                                     | 52.3           | 4.34, m                                     | 23, 27     | 20    |               |
| 23 – CH <sub>2</sub> a<br>CH <sub>2</sub> b | 40.4           | 1.37, ovl<br>1.46, m                        | 22, 24     |       | 21            |
| 24 – CH                                     | 24.9           | 1.38, ovl                                   | 23, 25, 26 |       | 21            |
| 25 – CH <sub>3</sub>                        | 23.1           | 0.79, d (5.9)                               | 24         |       | 23, 24, 26    |
| 26 – CH <sub>3</sub>                        | 23.1           | 0.87, ovl                                   | 24         |       | 23, 24, 25    |
| 27 – NH                                     |                | 8.01, ovl                                   | 22         | 29    | 28            |
| 28 – CO                                     | 169.7          |                                             |            |       |               |
| 29 – CH                                     | 60.0           | 4.58, dd (8.2, 3.9)                         | 30, 37     | 27    | 28            |
| 30 – CH                                     | 73.3           | 5.03, d (3.0)                               | 29         |       | 32, 36        |
| 31 – C                                      | 142.3          |                                             |            |       |               |
| 32/36 – CH                                  | 127.2          | 7.29, d (7.1)                               | 33/35      |       | 30, 32/36, 34 |
| 33/35 – CH                                  | 128.1          | 7.25, t (7.2)                               | 32/36, 34  |       | 31, 33/35     |
| 34 – CH                                     | 127.5          | 7.20, t (7.1)                               | 33/35      |       | 32, 36        |
| 37 – NH                                     |                | 7.64, bs                                    | 29         | 39    |               |
| 38 – CO                                     | n.a            |                                             |            |       |               |
| 39 – CH                                     | 57.7           | 4.16, t (7.3)                               | 40, 42     | 37    | 1             |
| 40 – CH                                     | 66.0           | 3.93, m                                     | 39, 41     |       |               |
| 41 – CH <sub>3</sub>                        | 20             | 0.98, d (6.2)                               | 40         |       | 39, 40        |
| 42 – NH                                     |                | 8.52, ovl                                   | 39         | 2     |               |

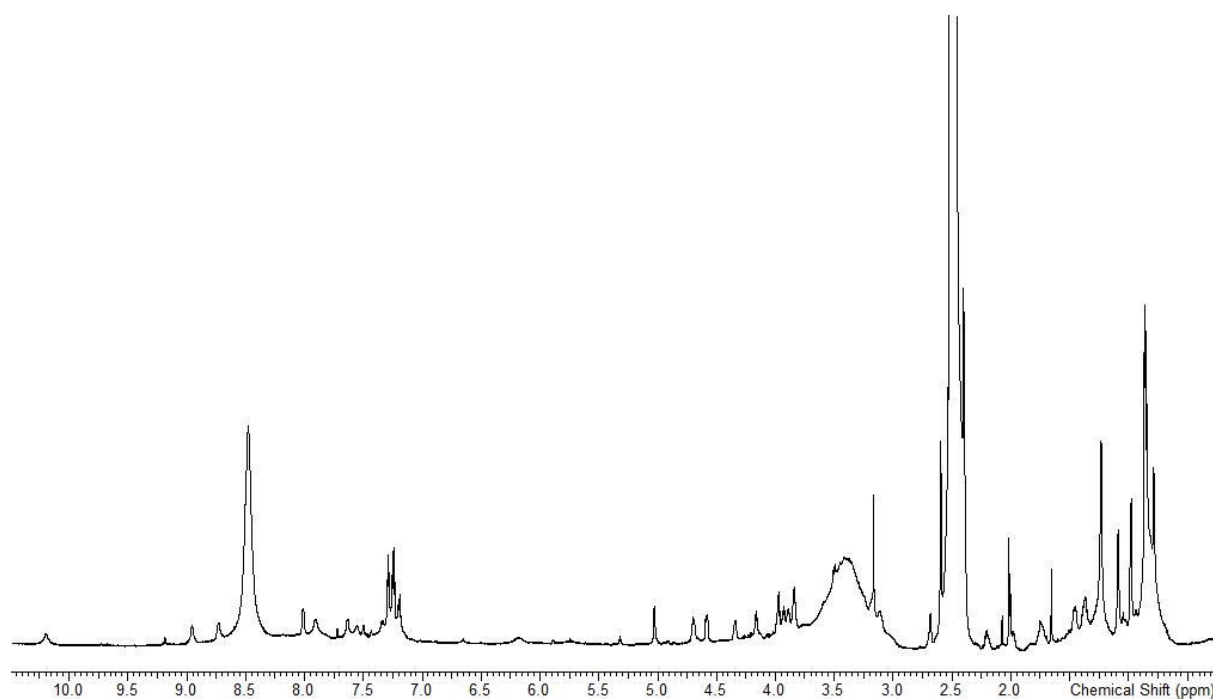

**Figure S6:**  $^1\text{H}$  spectrum of cyclofaulknamycin 2 (DMSO- $\text{d}_6$ , 700 MHz)

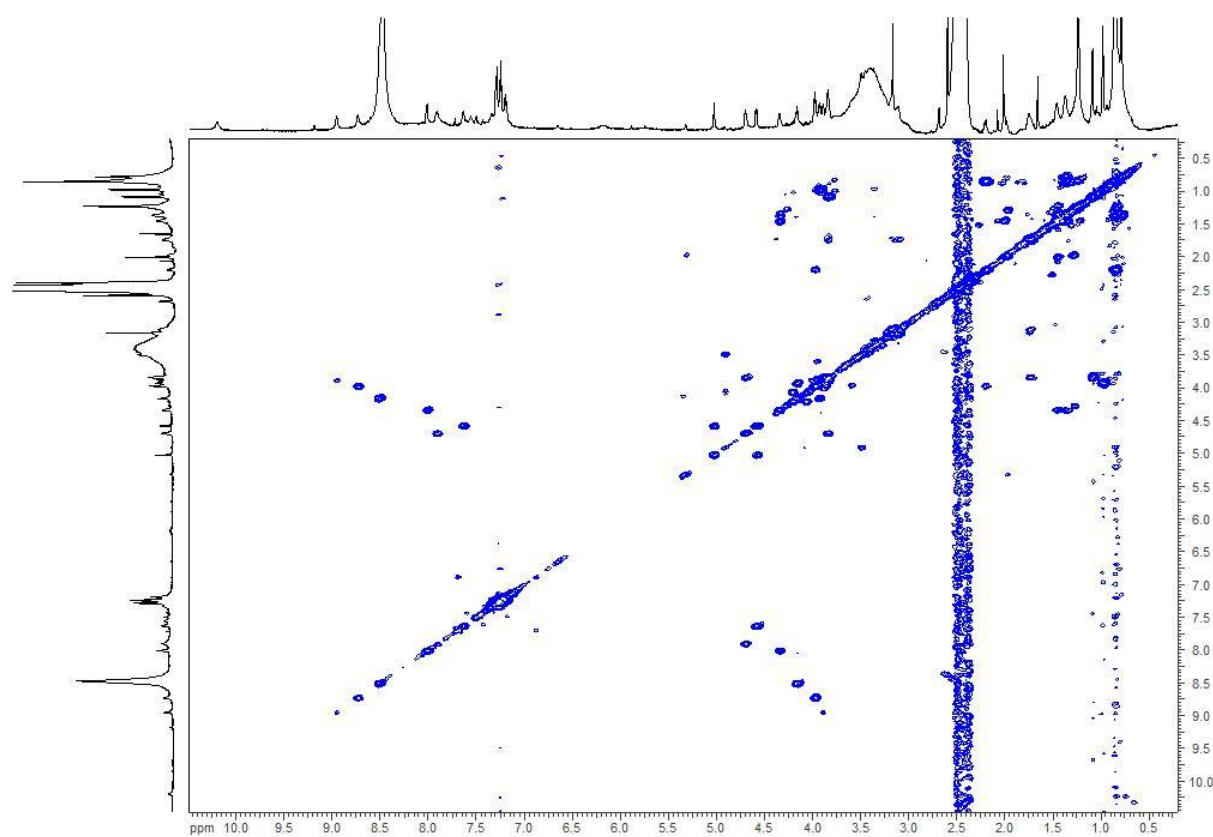

**Figure S7:** COSY spectrum of cyclofaulknamycin 2 (DMSO- $\text{d}_6$ , 700 MHz)

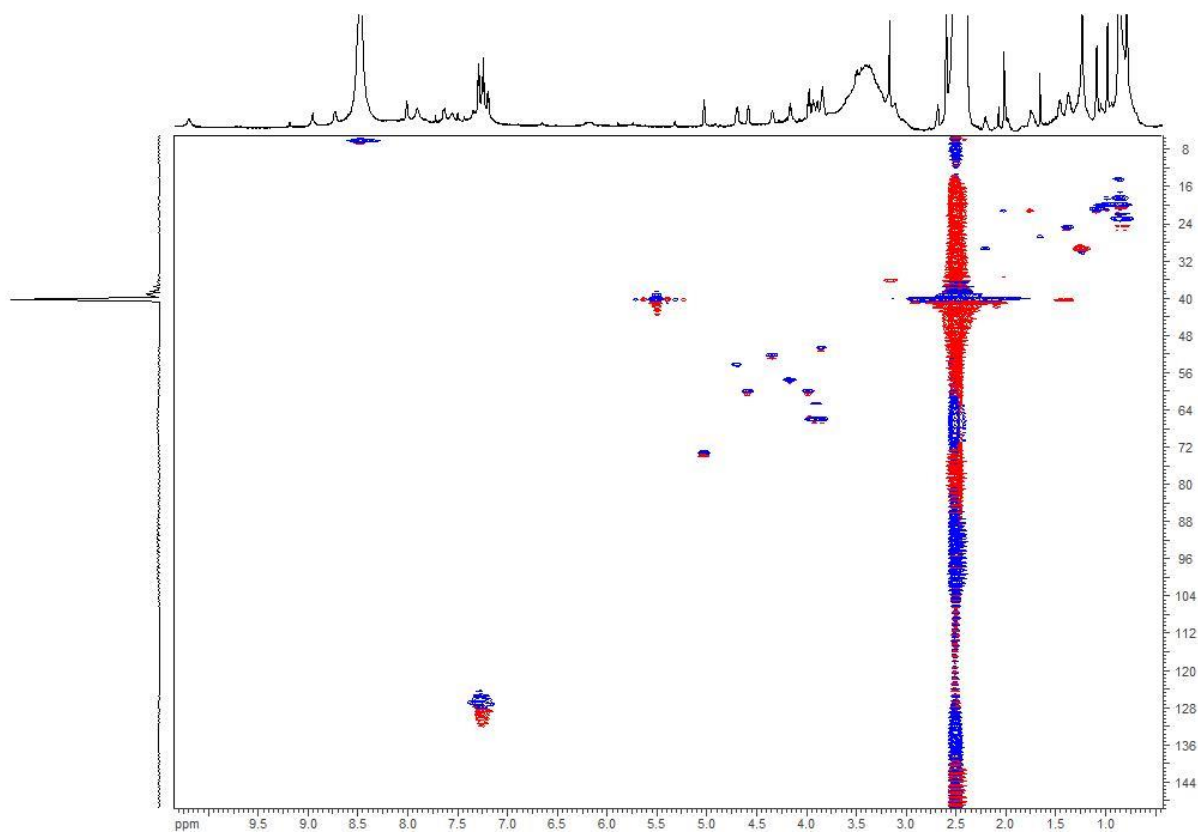

**Figure S8:** HSQC spectrum of cyclofaulknamycin **2** (DMSO- $d_6$ , 700 MHz, 175 MHz)

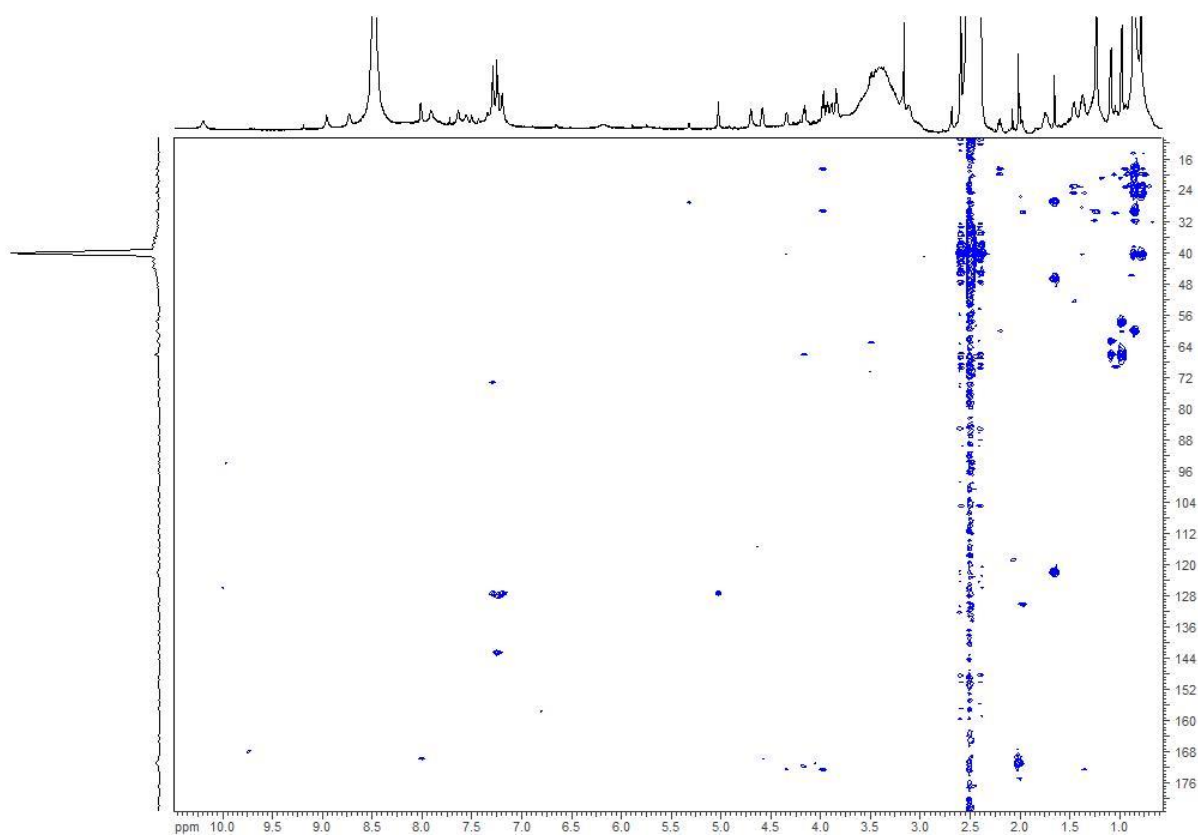

**Figure S9:** HMBC spectrum of cyclofaulknamycin **2** (DMSO- $d_6$ , 700 MHz, 175 MHz)

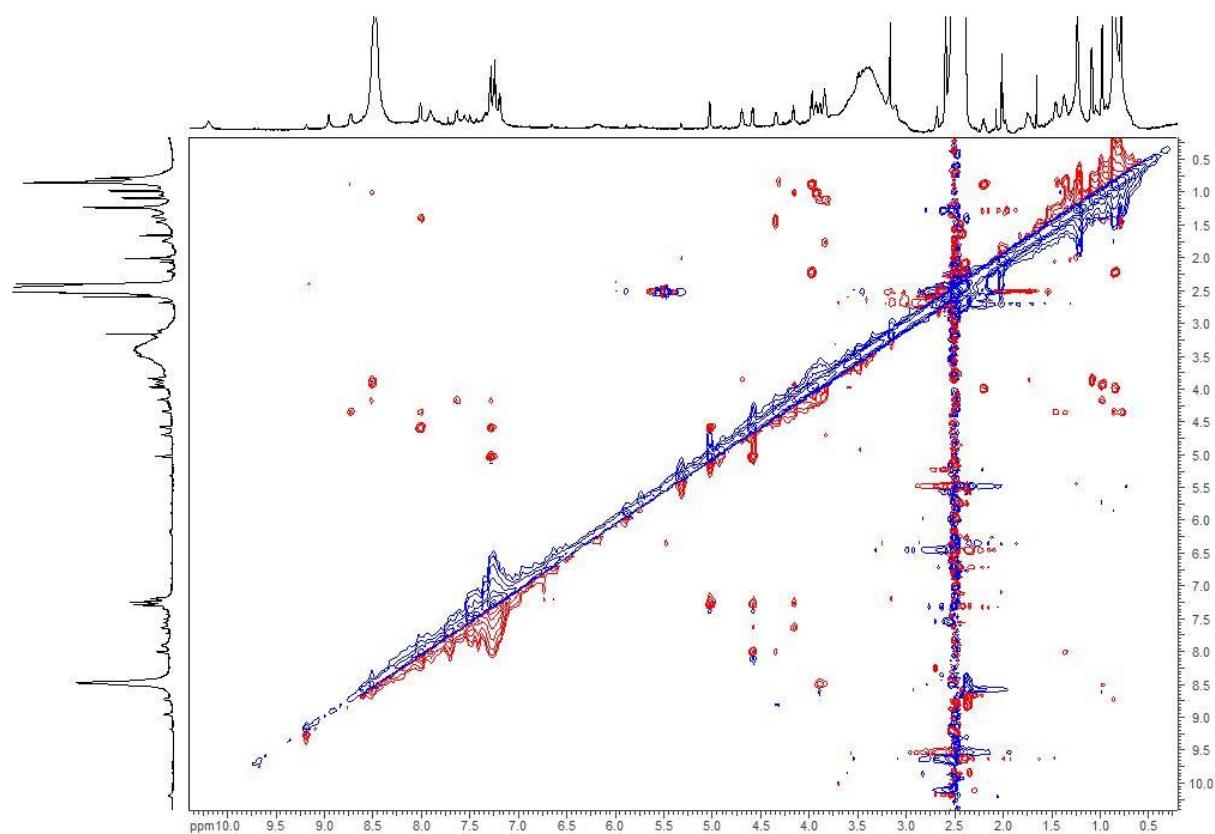

**Figure S1:** ROESY spectrum of cyclofaulknamycin **2** (DMSO- $d_6$ , 700 MHz)

## 2. Marfey's Analysis

Standards in D- and L-configuration were derivatized with L-FDLA and compared with the amino acids derived from hydrolysis of **1** (Fig. S11).

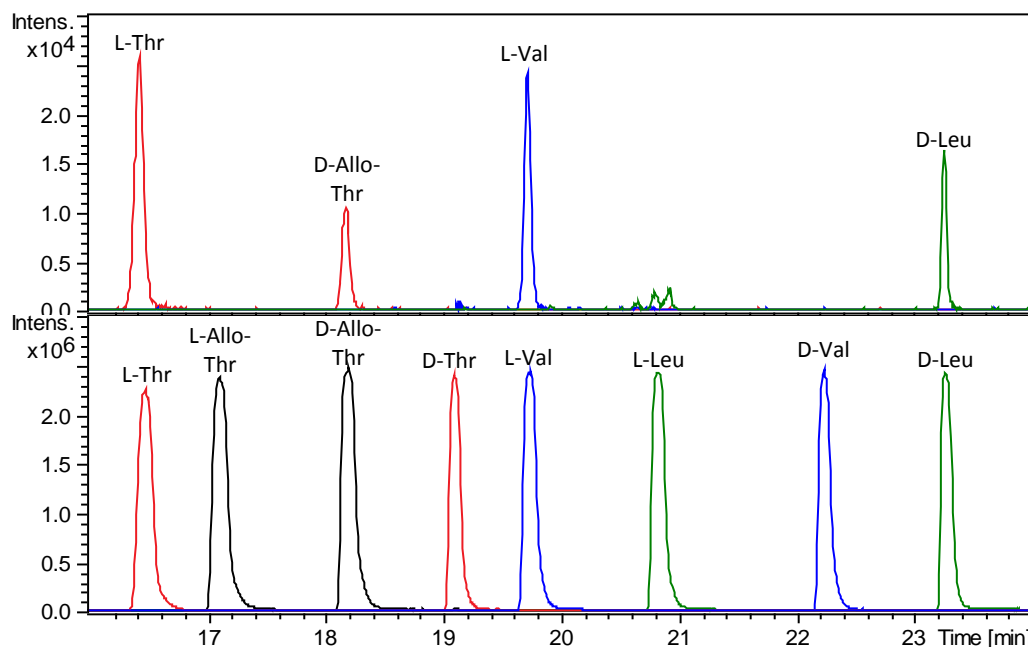

**Figure S2:** Marfey's chromatograms of the iso-faulknamycin hydrolysate (top) and the amino acids standards (bottom) derivatized with L-FDLA.

We obtained 2S-3R-capreomycinidine **3** and 2S-3S-capreomycinidine **4** by hydrolysis of capreomycin and chymostatin, respectively (fig. S12). The hydrolysates were derivatized with L-FDLA and D-FDLA, yielding all possible enantiomers with distinguishable retention time (table S4).

**Table S4:** Stereoisomers obtained after hydrolysis of capreomycin and chymostatin and the equivalent enantiomers with equivalent retention time (RT).

| hyd. of capreomycin    | L-FDLA     | D-FDLA     | hyd. of chymostatin    | L-FDLA     | D-FDLA     |
|------------------------|------------|------------|------------------------|------------|------------|
| 2S-3R-capreomycinidine | <i>LSR</i> | <i>DSR</i> | 2S-3S-capreomycinidine | <i>LSS</i> | <i>DSS</i> |
| RT equivalent to       | <i>DRS</i> | <i>LRS</i> | RT equivalent to       | <i>DRR</i> | <i>LRR</i> |

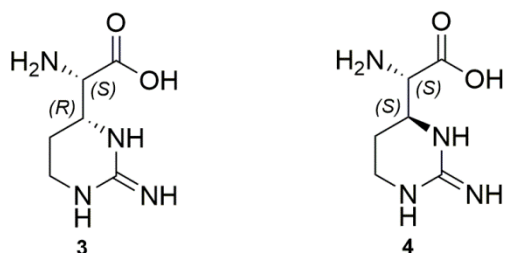

**Figure S12:** Capreomycinidine from capreomycine (**3**) and chymostatine (**4**).

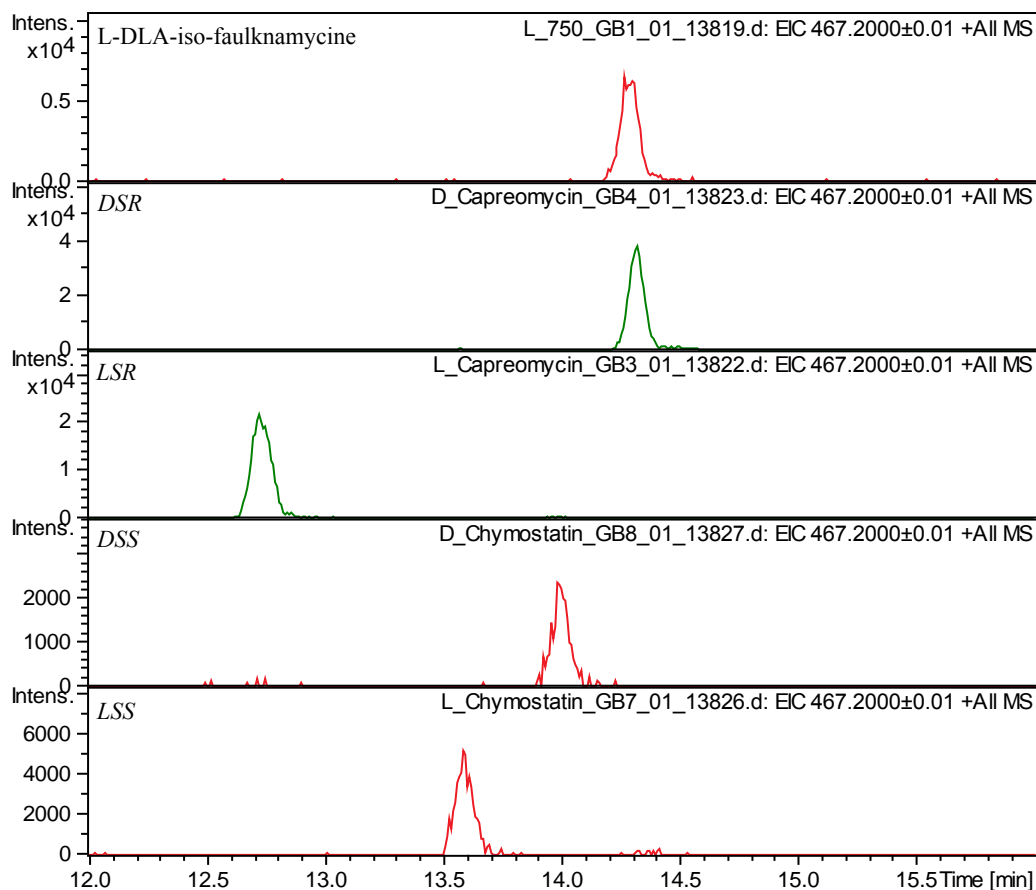

**Figure S13:** Marfey's chromatograms showing the extracted mass of DLA-capreomycidine of the hydrolysed L-DLA-iso-faulknamycin and the references obtained from hydrolysis of capreomycidine and chymostatin derivatized with D-FDLA ( DSR, DSS) and L-FDLA (LSS, LSR). DSR is equivalent to LRS, therefore iso-faulknamycin contains the 2R-3S-capreomycidine.

D-*threo*- $\beta$ -phenylserine **5** has been determined to be the constituent amino acid in faulknamycin (fig. S14). Therefore, we used DL-*threo*- $\beta$ -phenylserine as a reference to determine the stereochemistry of  $\beta$ -phenylserine of the hydrolysed iso-faulknamycin (Fig. S14, S16).

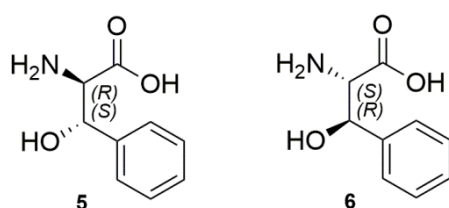

**Figure S14:** D-*threo*- $\beta$ -phenylserine (**5**) and L-*threo*- $\beta$ -phenylserine (**6**)

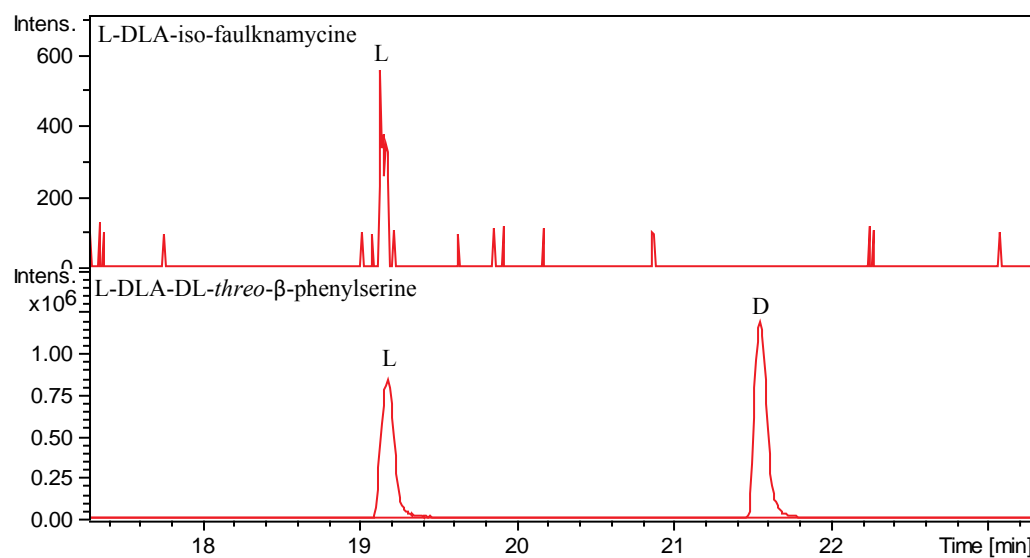

**Figure S15:** Marfey's chromatograms showing the extracted mass of DLA-phenylserine of the hydrolysed iso-faulknamycin and DL-*threo*- $\beta$ -phenylserine, both derivatized with L-FDLA.

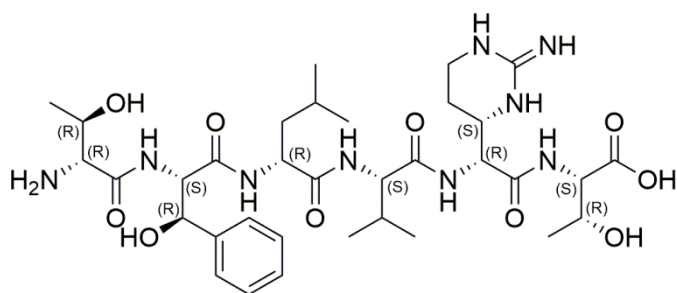

**Figure S16:** Absolute configuration of iso-faulknamycin.

### 3. MS/MS Fragmentation

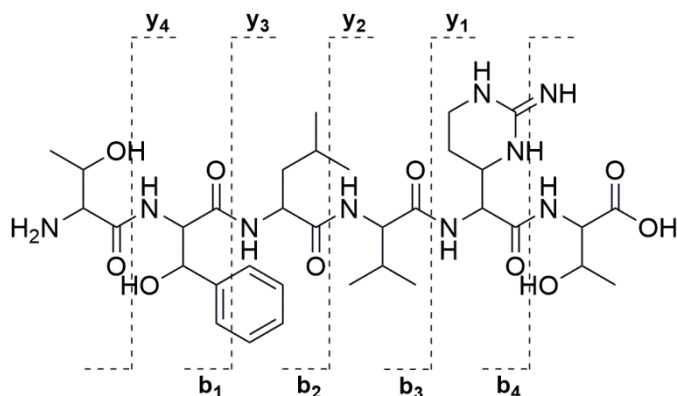

**Figure S3:** Observed y-ion and b-ions from the MS/MS fragmentation (see table 5) of iso-faulknamycin

**Table S5:** Calculated and observed y-ion and b-ion fragments of iso-faulknamycin.

| ion type                    | y <sub>1</sub> | y <sub>2</sub> | y <sub>3</sub> | y <sub>4</sub> |
|-----------------------------|----------------|----------------|----------------|----------------|
| [M] <sup>+</sup> calculated | 274.1511       | 373.2190       | 486.3032       | 649.3675       |
| [M] <sup>+</sup> observed   | 274.1517       | 373.2180       | 486.3034       | 649.3674       |
| Δ [ppm]                     | -2.2           | 3.8            | -0.4           | 0.2            |
| ion type                    | b <sub>1</sub> | b <sub>2</sub> | b <sub>3</sub> | b <sub>4</sub> |
| [M] <sup>+</sup> calculated | 265.1186       | 378.2019       | 477.2697       | 631.3556       |
| [M] <sup>+</sup> observed   | 265.1185       | 378.2021       | 477.2698       | 631.3573       |
| Δ [ppm]                     | 0.4            | -0.5           | -0.2           | -2.7           |

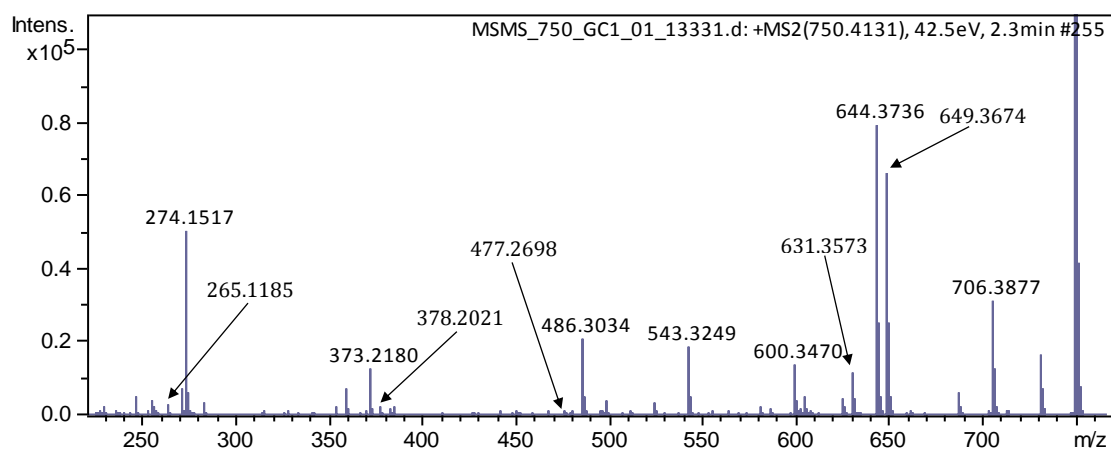

**Figure S18:** MS/MS fragmentation spectrum of iso-faulknamycin ([M+H]<sup>+</sup> peak).

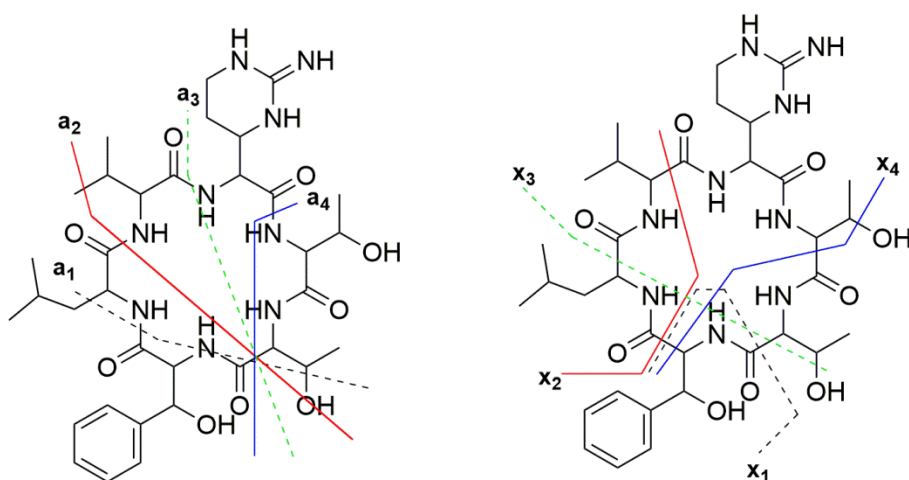

**Figure S19:** Observed a-ion and x-ions from the MS/MS fragmentation (see table 6) of cyclofaulknamycin

**Table S6:** Calculated and observed a-ion and x-ion fragments within 5 ppm of cyclofaulknamycin.

| ion type                    | a1                             | a2                                  | a3                                                       | a4                                         |
|-----------------------------|--------------------------------|-------------------------------------|----------------------------------------------------------|--------------------------------------------|
| AA sequence                 | T <sub>1</sub> -T <sub>2</sub> | T <sub>1</sub> -T <sub>2</sub> -Cmp | T <sub>1</sub> -T <sub>2</sub> -Cmp-V                    | T <sub>1</sub> -T <sub>2</sub> -Cmp-V-L    |
| [M] <sup>+</sup> calculated | 175.1077                       | 329.1932                            | 428.2616                                                 | 541.3457                                   |
| [M] <sup>+</sup> observed   | 175.1082                       | 329.1940                            | 428.2622                                                 | 541.3474                                   |
| deviation [ppm]             | 2.9                            | 2.4                                 | 1.4                                                      | 3.1                                        |
| ion type                    | x1                             | x2                                  | x3                                                       | x4                                         |
| AA sequence                 | βPhS(-H <sub>2</sub> O)        | L-V                                 | V-cmp-T <sub>2</sub> -T <sub>1</sub> (-H <sub>2</sub> O) | L-V-Cmp-T <sub>2</sub> (-H <sub>2</sub> O) |
| [M] <sup>+</sup> calculated | 146.0600                       | 211.1441                            | 438.2459                                                 | 466.2772                                   |
| [M] <sup>+</sup> observed   | 146.0607                       | 211.1444                            | 438.2470                                                 | 466.2782                                   |
| deviation [ppm]             | 4.8                            | 1.4                                 | 2.5                                                      | 2.1                                        |

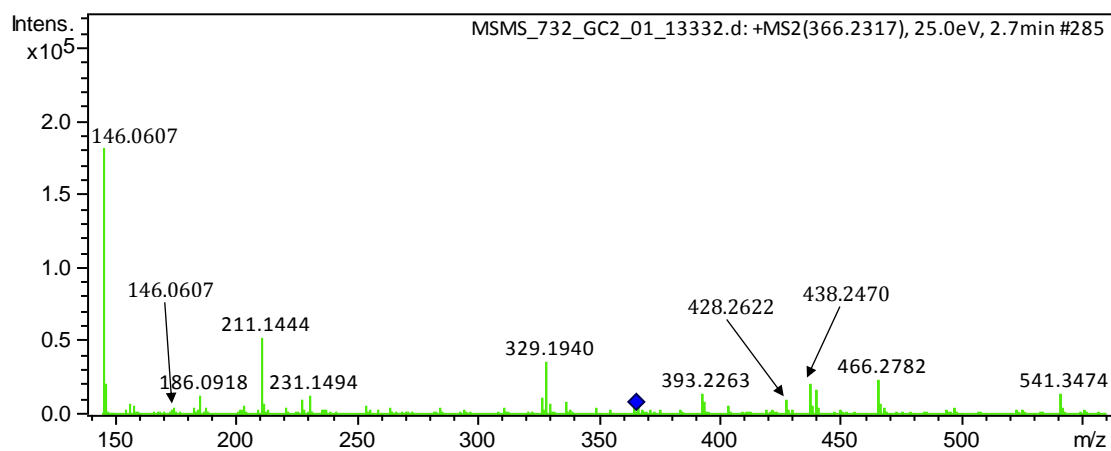

**Figure S20:** MS/MS fragmentation spectrum of cyclofaulknamycin ([M+2H]<sup>2+</sup> peak)

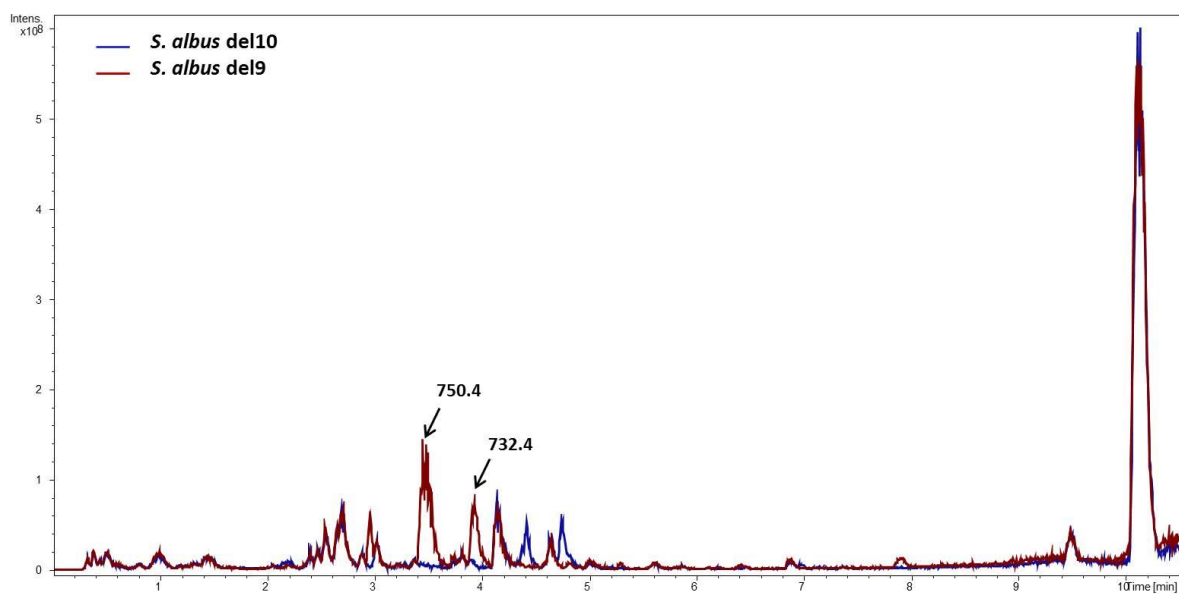

**Figure S21:** Secondary metabolite profile of the *S. albus* del9 and del 10 strains. Butanol extraction.
